# Supplementary material for: How Do Self-Examination Interventions For The Early Detection of Cancer Work? An Umbrella Review Protocol.
Source: Research Square preprint supplement (doi:10.21203/rs.3.rs-1116848/v1), 2021-12-21
Supplement: Supplementary file 1 [file 3d9031c2fad55344af8a80b7.docx]

**Additional file 3: Data Extraction Tables 1 and 2**

| **Table 1: Review characteristics** | | | | | | | | | | | | |
| --- | --- | --- | --- | --- | --- | --- | --- | --- | --- | --- | --- | --- |
| **Title, author, citation and funding source** | **Aim** | **Year** | **Study Designs included** | **Cancer type** | **Population** | **Intervention descriptions using ITAX domains** | **Behavioural Change Techniques identified coded using BCTTV1** | **Comparator** | **Outcomes** | **Quality Assessment tools used** | **Patient/public involvement in design/planning** | **Type of analysis/synthesis** |

| **Table 2: Findings and quality assessment** | | | | | | | | |
| --- | --- | --- | --- | --- | --- | --- | --- | --- |
| **Title, author and citation** | **Number of included studies and sample size** | **Geographic locations of included studies** | **Date range of search** | **Adverse events** | **Review conclusions** | **AMSTAR-2 risk grading** | **Review recommendations for further research** | **Umbrella review authors comments** |
